# Supplementary material for: Human Factors Evaluation of HeartMate 3 Left Ventricular Assist Device Peripherals: An Eye Tracking Supported Simulation Study
Source: Springer Nature journal article supplement (doi:10.1007/s10916-023-01950-3), 2023-05-03

**Title:** Human factors evaluation of HeartMate 3 left ventricular assist device peripherals: An eye tracking supported simulation study.

**Journal name:** Journal of Medical Systems

**Authors:** Gregor Widhalm<sup>1</sup>, Theodor Abart<sup>1</sup>, Moritz Noeske<sup>1</sup>, Lisa Kumer<sup>2</sup>, Katharina Ebenberger<sup>1</sup>, Clemens Atteneder<sup>1</sup>, Angelika Berger<sup>2</sup>, Günther Laufer<sup>1</sup>, Dominik Wiedemann<sup>1</sup>, Daniel Zimpfer<sup>1</sup>, Heinrich Schima<sup>1,3,4</sup>, Michael Wagner<sup>2</sup>, Thomas Schlöglhofer<sup>1,3,4</sup>

<sup>1</sup>Department of Cardiac Surgery, Medical University of Vienna, Vienna, Austria; <sup>2</sup>Division of Neonatology, Pediatric Intensive Care and Neuropediatrics, Department of Pediatrics, Comprehensive Center for Pediatrics, Medical University of Vienna, Vienna, Austria; <sup>3</sup>Ludwig Boltzmann Institute for Cardiovascular Research, Vienna, Austria; <sup>4</sup>Center for Medical Physics and Biomedical Engineering, Medical University of Vienna, Vienna, Austria

**Email corresponding author:** thomas.schloeglhofer@meduniwien.ac.at

**Supplementary File 2:** Defined areas of interest (AOIs) per provided HeartMate 3 component for the first five simulated scenarios.

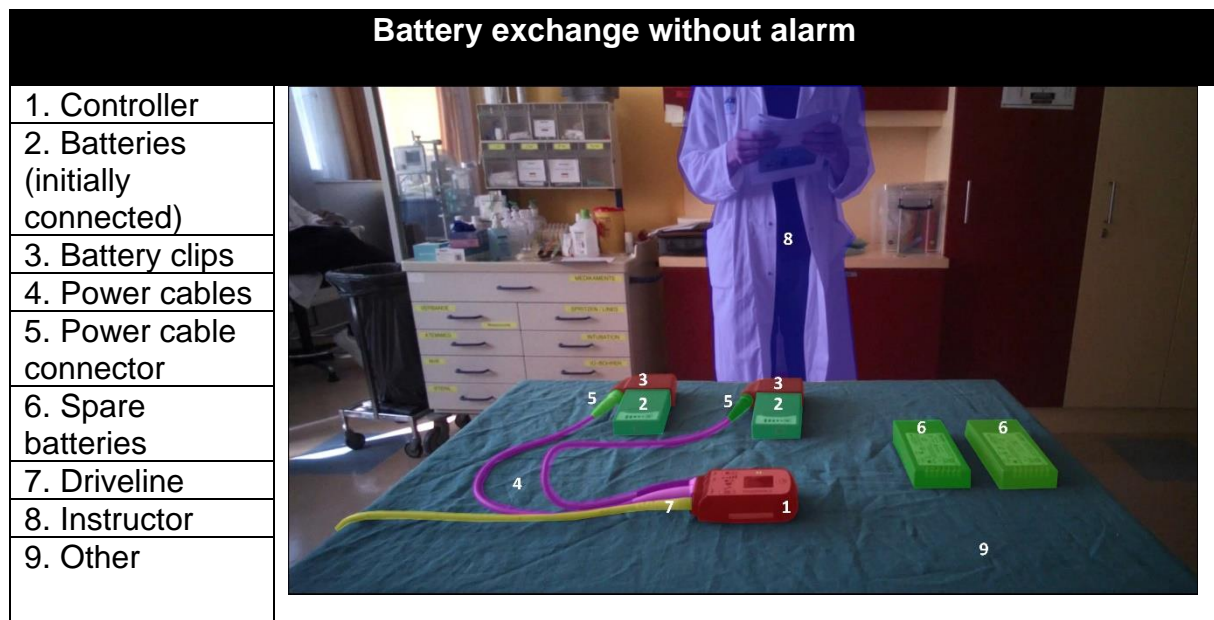

## AC power connection and reconnection of batteries

1. Controller
2. Batteries (initially connected)
3. Battery clips
4. Power cables
5. Power cable connector
6. HM3 Mobile Power Unit
7. AC power cable
8. Power socket
9. Driveline
10. Instructor
11. Other

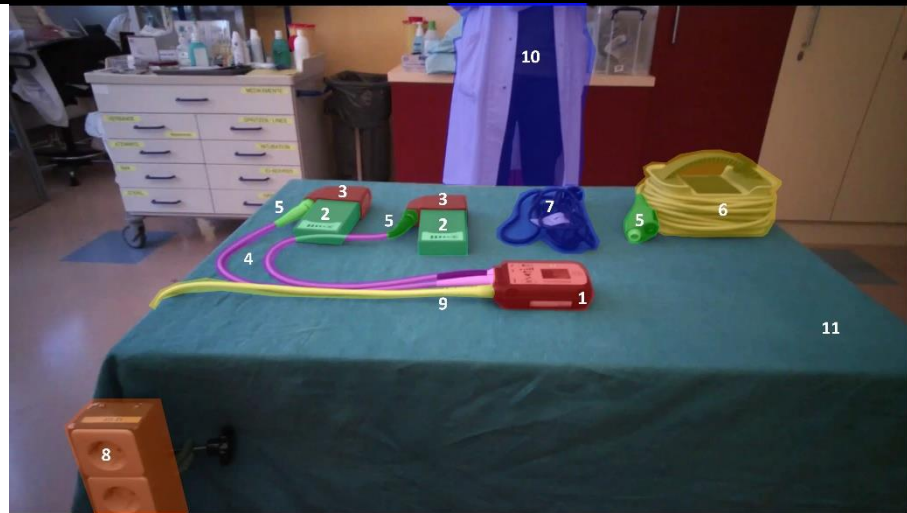

## Battery exchange as reaction to alarm

1. Controller
2. Batteries (initially connected)
3. Battery clips
4. Power cables
5. Power cable connector
6. Spare batteries
7. Display (Warning)
8. Driveline
9. Instructor
10. Other

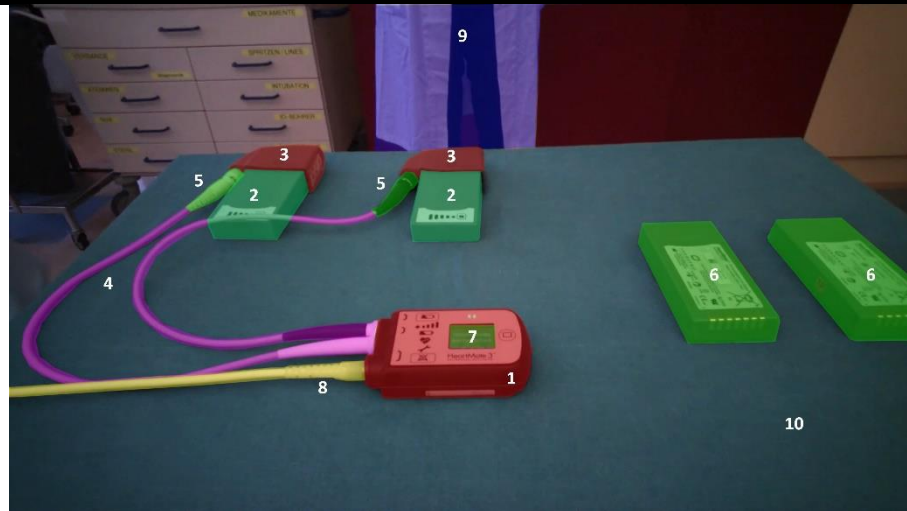

## Driveline dis- and reconnection

1. Controller
2. Batteries (initially connected)
3. Battery clips
4. Power cables
5. Power cable connector
6. Driveline
7. Driveline connector
8. Instructor
9. Other

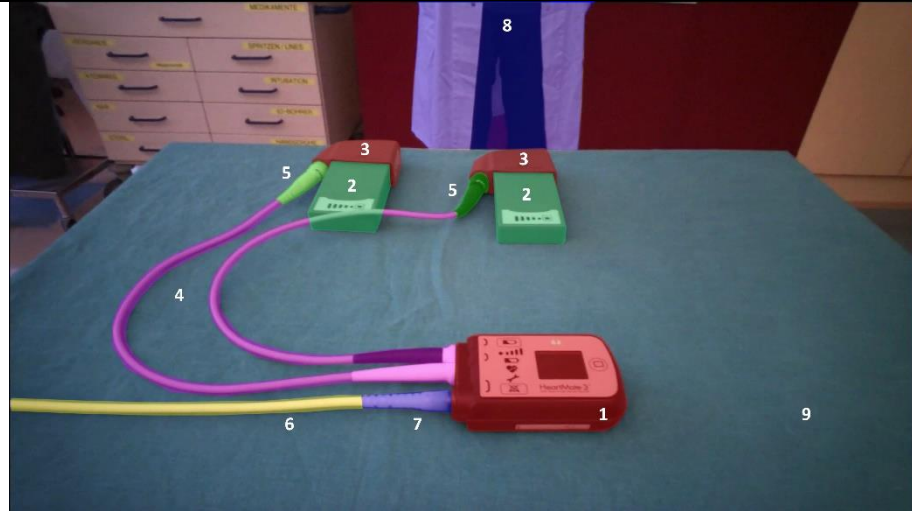

## Emergency controller exchange as reaction to alarm

1. Controller
2. Batteries (initially connected)
3. Battery clips
4. Power cables
5. Power cable connector
6. Spare controller
7. Spare controller power cables
8. Spare power cable connector
9. Driveline
10. Driveline connector
11. Instructor
12. Other

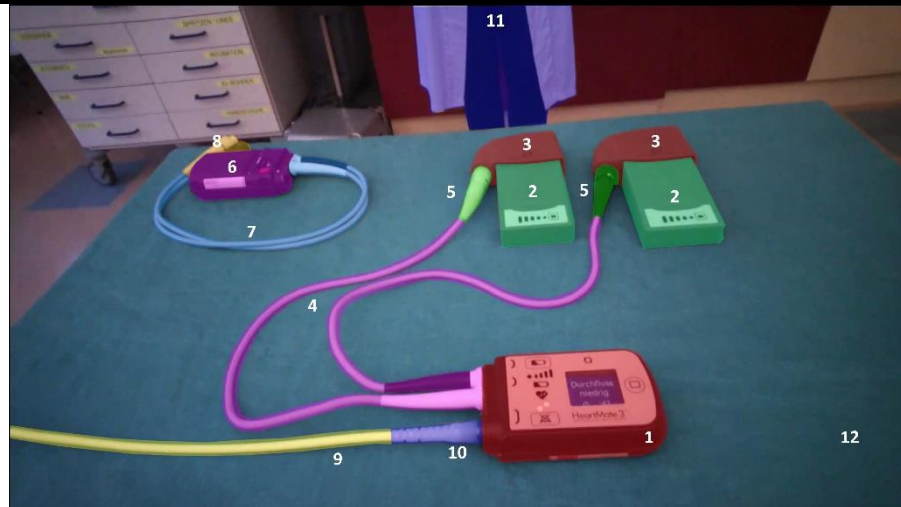

Supplement: MOESM2 [file 25314202]
