# Supplementary material for: Human Factors Evaluation of HeartMate 3 Left Ventricular Assist Device Peripherals: An Eye Tracking Supported Simulation Study
Source: Springer Nature journal article supplement (doi:10.1007/s10916-023-01950-3), 2023-05-03
Supplement: MOESM1 [file 25314202]

**Title:** Human factors evaluation of HeartMate 3 left ventricular assist device peripherals: An eye tracking supported simulation study.

**Journal name:** Journal of Medical Systems

**Authors:** Gregor Widhalm<sup>1</sup>, Theodor Abart<sup>1</sup>, Moritz Noeske<sup>1</sup>, Lisa Kumer<sup>2</sup>, Katharina Ebenberger<sup>1</sup>, Clemens Atteneder<sup>1</sup>, Angelika Berger<sup>2</sup>, Günther Laufer<sup>1</sup>, Dominik Wiedemann<sup>1</sup>, Daniel Zimpfer<sup>1</sup>, Heinrich Schima<sup>1,3,4</sup>, Michael Wagner<sup>2</sup>, Thomas Schlöglhofer<sup>1,3,4</sup>

<sup>1</sup>Department of Cardiac Surgery, Medical University of Vienna, Vienna, Austria; <sup>2</sup>Division of Neonatology, Pediatric Intensive Care and Neuropediatrics, Department of Pediatrics, Comprehensive Center for Pediatrics, Medical University of Vienna, Vienna, Austria; <sup>3</sup>Ludwig Boltzmann Institute for Cardiovascular Research, Vienna, Austria; <sup>4</sup>Center for Medical Physics and Biomedical Engineering, Medical University of Vienna, Vienna, Austria

**Email corresponding author:** thomas.schloeglhofer@meduniwien.ac.at

**Supplementary File 1:** Provided components, patient introduction and initial setting per simulated scenario. (HM3: HeartMate 3, AC: alternating current)

| Simulated scenario             | Provided components                                                                                                                                      | Subject Introduction                                                                                                                                                                                                                                    | Initial Setting                                                                                                                                                                                                                                                                                                                                                                                           |
|--------------------------------|----------------------------------------------------------------------------------------------------------------------------------------------------------|---------------------------------------------------------------------------------------------------------------------------------------------------------------------------------------------------------------------------------------------------------|-----------------------------------------------------------------------------------------------------------------------------------------------------------------------------------------------------------------------------------------------------------------------------------------------------------------------------------------------------------------------------------------------------------|
| Battery exchange without alarm | <ul style="list-style-type: none"><li>• Controller + 2 connected batteries</li><li>• Driveline to pump (mock loop)</li><li>• 2 spare batteries</li></ul> | “In front of you, you will find the controller including two batteries of a medical system, which is connected to the internal heart pump by means of the driveline, as well as two spare batteries. Please now exchange both batteries of the system.” |  A photograph showing the HeartMate 3 controller and its associated components. The controller is a rectangular device with a small screen and buttons. It is connected to two batteries via a driveline. Two spare batteries are also visible next to the controller. The entire setup is placed on a green surface. |

| Simulated scenario                                | Provided components                                                                                                                                                                        | Subject Introduction                                                                                                                                                                                                                                                                    | Initial Setting                                                                      |
|---------------------------------------------------|--------------------------------------------------------------------------------------------------------------------------------------------------------------------------------------------|-----------------------------------------------------------------------------------------------------------------------------------------------------------------------------------------------------------------------------------------------------------------------------------------|--------------------------------------------------------------------------------------|
| AC power connection and reconnection of batteries | <ul style="list-style-type: none"> <li>• Controller + 2 connected batteries</li> <li>• Driveline to pump (mock loop)</li> <li>• HM3 Mobile Power Unit</li> <li>• AC power cable</li> </ul> | <p>“In front of you, you will again find the medical device to be tested. In addition, a power socket can be found here (...).<br/>Connect the controller to the power supply. Subsequently, please disconnect the system from AC power supply and restore the original situation.”</p> |   |
| Battery exchange as reaction to alarm             | <ul style="list-style-type: none"> <li>• Controller + 2 connected batteries (low)</li> <li>• Driveline to pump (mock loop)</li> <li>• 2 spare batteries</li> </ul>                         | <p>“In front of you, you will again find the medical device to be tested.<br/>You will see an error message on the display. In addition, you will perceive an acoustic alarm. Please rectify the problem.”</p>                                                                          |   |
| Driveline dis- and reconnection                   | <ul style="list-style-type: none"> <li>• Controller + 2 connected batteries</li> <li>• Driveline to pump (mock loop)</li> </ul>                                                            | <p>“In front of you, you will again find the medical device to be tested with a connection of the internal heart pump to the external control unit. Please disconnect the control unit from the heart pump. This will trigger an alarm. Re-establish the connection afterwards.”</p>    |  |

| Simulated scenario                                 | Provided components                                                                                                                                                                                 | Subject Introduction                                                                                                                                                                                                       | Initial Setting                                                                      |
|----------------------------------------------------|-----------------------------------------------------------------------------------------------------------------------------------------------------------------------------------------------------|----------------------------------------------------------------------------------------------------------------------------------------------------------------------------------------------------------------------------|--------------------------------------------------------------------------------------|
| Emergency controller exchange as reaction to alarm | <ul style="list-style-type: none"> <li>• Controller + 2 connected batteries</li> <li>• Driveline to pump (mock loop)</li> <li>• Spare controller</li> </ul>                                         | <p>“In front of you, you will again find the medical device to be tested.<br/>There is now a problem with the controller.<br/>Please replace it with a new controller.”</p>                                                |   |
| Battery exchange in dim light                      | <ul style="list-style-type: none"> <li>• Controller + 2 connected batteries</li> <li>• Driveline to pump (mock loop)</li> <li>• 2 spare batteries</li> </ul>                                        | <p>“The room is now darkened.<br/>Please exchange both batteries of the system now.”</p>                                                                                                                                   |   |
| Battery exchange within consolidated bag           | <ul style="list-style-type: none"> <li>• Controller + 2 connected batteries (empty)</li> <li>• Driveline to pump (sticked to the subject's abdomen)</li> <li>• 2 spare batteries (empty)</li> </ul> | <p>“During the next scenario, the components of the device are in a consolidated bag. We will put this consolidated bag on together. Please exchange both batteries while the controller remains in the bag provided.”</p> |  |
